# Supplementary material
Source: PubMed Central journal article supplement (PMC6340723)
Supplement: NIHMS1511644-supplement-1.pdf [file NIHMS1511644-supplement-1.pdf]

**Supplementary Table 1. Phase 2 Trials of Targeted Chemotherapy for HCC**

BCLC, Barcelona Clinic Liver Cancer classification; ECOG, Eastern Cooperative Oncology Group; PS, Performance Status. mAb, monoclonal antibody. VEGFR2 -Vascular endothelial growth factor receptor 2; CDK- cyclin-dependent kinase; EGFR- Epidermal growth factor receptor. TGF- Transforming growth factor.

| TRIAL NAME, DRUG        | CLINICAL TRIAL ID | MECHANISM OF ACTION                                                         | TITLE OF STUDY                                                                                                                                                                                                                                        | LINE OF THERAPY | INCLUSION CRITERIA                                                     | STATUS         | Date of Completion |
|-------------------------|-------------------|-----------------------------------------------------------------------------|-------------------------------------------------------------------------------------------------------------------------------------------------------------------------------------------------------------------------------------------------------|-----------------|------------------------------------------------------------------------|----------------|--------------------|
| CHR-2845, Tefinostat    | NCT02759601       | Histone deacetylase inhibitor                                               | A Phase 1/2 Dose Escalation Trial of HDAC Inhibitor Tefinostat for Cancer Associated Inflammation in Hepatocellular Carcinoma                                                                                                                         | First/Second    | Child pugh A, BCLC B-C, ECOG PS 0-2.                                   | Recruiting     | June 2018          |
| Enzalutamide            | NCT02528643       | Androgen receptor blockade                                                  | A Phase 2, Randomized, Double-Blind, Placebo-Controlled Study to Assess the Efficacy and Safety of Enzalutamide in Subjects With Advanced Hepatocellular Carcinoma                                                                                    | Second          | Child Pugh A, BCLC B-C, ECOG PS 0-1. Failed Sorafenib                  | Recruiting     | May 2019           |
| Apatinib                | NCT03046979       | VEGFR2 inhibitor                                                            | Study of Apatinib in Advanced Hepatocellular Carcinoma(HCC)                                                                                                                                                                                           | Second          | Child Pugh A, BCLC C, ECOG PS 0-1. Failed Sorafenib                    | Recruiting     | December 2018      |
| Milciclib               | NCT03109886       | CDK inhibitor                                                               | Phase 2A Exploratory Study of Oral Milciclib Maleate in Patients With Unresectable or Metastatic Hepatocellular Carcinoma                                                                                                                             | Second          | Child Pugh A, BCLC C, ECOG PS 0-1. Failed Sorafenib                    | Recruiting     | August 2019        |
| CF102                   | NCT02128958       | A3 adenosine receptor agonist                                               | A Phase 2 Study in the Second-Line Treatment of Advanced Hepatocellular Carcinoma in Subjects With Child-Pugh Class B Cirrhosis                                                                                                                       | Second          | Child Pugh A-B, BCLC B-C, ECOG PS 0-2. Failed Sorafenib                | Recruiting     | September 2018     |
| INC280                  | NCT01737827       | c-Met inhibitor                                                             | A Phase 2, Open Label, Single Arm, Multicenter Study of INC280 Administered Orally in Adults With Advanced Hepatocellular Carcinoma                                                                                                                   | First           | Confirmed c-MET pathway dysregulation. Ahid pugh A. BCLC B-C. ECOG 0-2 | Recruiting     | July 2018          |
| Anlotinib               | NCT02809534       | EGFR inhibitor                                                              | A Single Group, Open Label, Single-center Clinical Trial to Assess the Efficacy and Safety of Anlotinib in Patients With Hepatocellular Carcinoma                                                                                                     | First/Second    | Child pugh A, BCLC B-C, ECOG PS 0-2.                                   | Recruiting     | December 2017      |
| LEE001                  | NCT02524119       | CDK4/6 inhibitor                                                            | A Phase 2 Study of LEE011 and Chemoembolization In Patients With Advanced Hepatocellular Carcinoma                                                                                                                                                    | First           | RB positive HCC, Locally advanced HCC, Child Pugh A-B, ECOG 0-2        | Recruiting     | September 2018     |
| BTCRC-GI13-002, MLN0128 | NCT02575339       | mTOR inhibitor                                                              | An Open Label Randomized Phase I/2 Trial of MLN0128 Compared to Sorafenib in Patients With Advanced or Metastatic Hepatocellular Carcinoma: Big Ten Cancer Research Consortium                                                                        | First           | Child Pugh A, BCLC B-C, ECOG PS 0-1. No prior systemic therapy.        | Recruiting     | June 2020          |
| TRC105                  | NCT02560779       | Endoglin mAb+Multikinase inhibitor                                          | An Open Label Phase 1B/2 Trial of TRC105 and Sorafenib in Patients With Hepatocellular Carcinoma (HCC)                                                                                                                                                | First           | Child Pugh A, BCLC B-C, ECOG PS 0-1. No prior systemic therapy.        | Recruiting     | September 2018     |
| eFT508                  | NCT03318562       | Mitogen-Activated Protein Kinase Interacting Kinase (MNK) 1 and 2 inhibitor | A PD Study of Oral eFT508 in Subjects With Advanced TNBC and HCC                                                                                                                                                                                      | First/Second    | Child Pugh A, BCLC B-C, ECOG PS 0-1.                                   | Recruiting     | May 2018           |
| Varlitinib              | NCT03499626       | EGFR and Her-2/neu inhibitor                                                | Phase 1b of ASLAN001 (Varlitinib) in Patients With Advanced/ Metastatic Hepatocellular Carcinoma (HCC)                                                                                                                                                | Second          | Child Pugh A, BCLC B-C, ECOG PS 0-1. Failed Sorafenib/Lenvatinib       | Recruiting     | May 2021           |
| Axinitib                | NCT01334112       | Tyrosine kinase inhibitor                                                   | A Phase 2 Trial of Axitinib (AG-013736) After Prior Antiangiogenic Therapy in Advanced Hepatocellular Carcinoma                                                                                                                                       | Second          | Child Pugh A, BCLC B-C, ECOG PS 0-1. Failed Sorafenib                  | Not Recruiting | March 2018         |
| Enzalutamide            | NCT02528643       | Androgen receptor                                                           | A Phase 2, Randomized, Double-Blind, Placebo-Controlled Study to Assess the Efficacy and Safety of Enzalutamide in Subjects With Advanced Hepatocellular Carcinoma                                                                                    | Second          | Child Pugh A, BCLC B-C, ECOG PS 0-1. Failed Sorafenib                  | Not Recruiting | May 2019           |
| LY2157299               | NCT02178358       | TGF b receptor inhibitor                                                    | A Randomized Phase 2 Study of LY2157299 Versus LY2157299 - Sorafenib Combination Versus Sorafenib in Patients With Advanced Hepatocellular Carcinoma                                                                                                  | First           | Child Pugh A, BCLC B-C, ECOG PS 0-1                                    | Not Recruiting | December 2018      |
| PD-0332991              | NCT01356628       | CDK inhibitor                                                               | A Phase 2 Study of PD-0332991 in Adult Patients With Advanced Hepatocellular Carcinoma                                                                                                                                                                | Second          | RB positive HCC, Child Pugh A-B, BCLC B-C, ECOG 0-2. Failed Sorafenib  | Not Recruiting | August 2019        |
| ABC294640               | NCT02939807       | Sphingosine Kinase 2 inhibitor                                              | A Phase 2 Study of ABC294640 in Patients With Advanced Hepatocellular Carcinoma Who Have Progressed on Sorafenib                                                                                                                                      | Second          | Child Pugh A, BCLC B-C, ECOG PS 0-1. Failed Sorafenib                  | Not Recruiting | May 2021           |
| Tivozanib               | NCT01835223       | VEGF tyrosine kinase inhibitor                                              | Multicenter Phase 1b/2 Study of Tivozanib in Patients With Advanced Inoperable Hepatocellular Carcinoma                                                                                                                                               | First           | Child Pugh A, BCLC B-C, ECOG PS 0-1                                    | Not Recruiting | December 2019      |
| BB1503                  | NCT02232633       | Stemness kinase inhibitor                                                   | A Phase 2 Clinical Study of BB1503 in Adult Patients With Advanced Hepatobiliary Cancer                                                                                                                                                               | First           | Child Pugh A, BCLC B-C, ECOG PS 0-1. HCC or Cholangiocarcinoma         | Not Recruiting | December 2018      |
| MSC2156119J             | NCT01988493       | c-Met inhibitor                                                             | A Multicenter, Randomized, Phase 1b/2 Trial to Evaluate the Efficacy, Safety, and Pharmacokinetics of MSC2156119J as Monotherapy Versus Sorafenib in Asian Subjects With MET+ Advanced Hepatocellular Carcinoma and Child-Pugh Class A Liver Function | First/Second    | Asian patients with MET+tumors, Child Pugh A. BCLC B-C, ECOG PS 0-2    | Not Recruiting | October 2018       |
